# Supplementary material for: Transcriptome-Based Study on the Phylogeny and Hybridization of Marattialean Ferns (Marattiaceae)
Source: MDPI journal article supplement (doi:10.3390/plants12122237), 2023-06-07
Supplement: s1 [file s1]

Table S1. The references of complete organelle genome used in this study.

| Species                           | Genbank number | Organelle     | Study                           |
|-----------------------------------|----------------|---------------|---------------------------------|
| <i>Psilotum nudum</i>             | KX171638       | mitochondrion | Guo <i>et al.</i> , 2017        |
| <i>Psilotum nudum</i>             | KX171639       | mitochondrion | Guo <i>et al.</i> , 2017        |
| <i>Ophioglossum californicum</i>  | NC030900       | mitochondrion | Guo <i>et al.</i> , 2017        |
| <i>Angiopteris evecta</i>         | DQ821119       | chloroplast   | Roper <i>et al.</i> , 2007      |
| <i>Christensenia aesculifolia</i> | NC044756       | chloroplast   | Liu <i>et al.</i> , 2019        |
| <i>Danaea sellowiana</i>          | NC051976       | chloroplast   | Lehtonen <i>et al.</i> , 2020   |
| <i>Equisetum arvense</i>          | NC014699       | chloroplast   | Karol <i>et al.</i> , 2010      |
| <i>Hymenophyllum holochilum</i>   | NC039753       | chloroplast   | Kuo <i>et al.</i> , 2018        |
| <i>Marattia laxa</i>              | NC051979       | chloroplast   | Lehtonen <i>et al.</i> , 2020   |
| <i>Ophioglossum californicum</i>  | NC020147       | chloroplast   | Grewe <i>et al.</i> , 2013      |
| <i>Osmunda mildei</i>             | MZ292715       | chloroplast   | Zuo <i>et al.</i> , 2021        |
| <i>Osmundastrum cinnamomeum</i>   | NC024157       | chloroplast   | Kim <i>et al.</i> , 2014        |
| <i>Psilotum nudum</i>             | KC117179       | chloroplast   | Grewe <i>et al.</i> , 2013      |
| <i>Ptisana novoguineensis</i>     | NC051980       | chloroplast   | Lehtonen <i>et al.</i> , 2020   |
| <i>Vandenboschia speciosa</i>     | NC041000       | chloroplast   | Ruiz-Ruano <i>et al.</i> , 2018 |

Table S2. Sample composition of different datasets.

| Species                            | SRA number | 26-O-aa | 26-O-cds | 26-S-aa | 26-S-cds | 16-O-aa | 16-O-cds | 16-S-aa | 16-S-cds | Family-O-aa | Family-O-cds |
|------------------------------------|------------|---------|----------|---------|----------|---------|----------|---------|----------|-------------|--------------|
| <i>Angiopteris caudatiformis</i> ✓ | This study | ✓       | ✓        | ✓       | ✓        | ✓       | ✓        | ✓       | ✓        |             |              |
| <i>Angiopteris fokiensis</i>       | This study | ✓       | ✓        | ✓       | ✓        | ✓       | ✓        | ✓       | ✓        |             |              |
| <i>Angiopteris hokouensis</i>      | This study | ✓       | ✓        | ✓       | ✓        | ✓       | ✓        | ✓       | ✓        |             |              |
| <i>Angiopteris sparsisora</i>      | This study | ✓       | ✓        | ✓       | ✓        | ✓       | ✓        | ✓       | ✓        |             |              |
| <i>Angiopteris wangii</i>          | This study | ✓       | ✓        | ✓       | ✓        | ✓       | ✓        | ✓       | ✓        |             |              |
| <i>Angiopteris yunnanensis</i>     | This study | ✓       | ✓        | ✓       | ✓        | ✓       | ✓        | ✓       | ✓        |             |              |
| <i>Angiopteris bipinnate</i>       | This study | ✓       | ✓        | ✓       | ✓        | ✓       | ✓        | ✓       | ✓        |             |              |
| <i>Angiopteris latipinna</i>       | This study | ✓       | ✓        | ✓       | ✓        | ✓       | ✓        | ✓       | ✓        |             |              |
| <i>Angiopteris chingii</i>         | This study | ✓       | ✓        | ✓       | ✓        | ✓       | ✓        | ✓       | ✓        |             |              |
| <i>Angiopteris subrotundata</i>    | This study | ✓       | ✓        | ✓       | ✓        | ✓       | ✓        | ✓       | ✓        |             |              |
| <i>Christensenia aesculifolia</i>  | This study | ✓       | ✓        | ✓       | ✓        | ✓       | ✓        | ✓       | ✓        | ✓           | ✓            |
| <i>Christensenia aesculifolia</i>  | SRR6920618 | ✓       | ✓        | ✓       | ✓        | ✓       | ✓        | ✓       | ✓        |             |              |
| <i>Danaea nodosa</i>               | ERR2041196 | ✓       | ✓        | ✓       | ✓        | ✓       | ✓        | ✓       | ✓        |             |              |
| <i>Danaea nodosa</i>               | SRR6920621 | ✓       | ✓        | ✓       | ✓        | ✓       | ✓        | ✓       | ✓        | ✓           | ✓            |
| <i>Marattia</i> sp.                | ERR3487391 | ✓       | ✓        | ✓       | ✓        | ✓       | ✓        | ✓       | ✓        |             |              |
| <i>Ptisana pellucida</i>           | SRR6920616 | ✓       | ✓        | ✓       | ✓        | ✓       | ✓        | ✓       | ✓        |             |              |
| <i>Equisetum arvense</i>           | SRR6920624 | ✓       | ✓        | ✓       | ✓        |         |          |         |          | ✓           | ✓            |
| <i>Equisetum diffusum</i>          | SRR2103706 | ✓       | ✓        | ✓       | ✓        |         |          |         |          | ✓           | ✓            |
| <i>Psilotum nudum</i>              | SRR6920623 | ✓       | ✓        | ✓       | ✓        |         |          |         |          | ✓           | ✓            |
| <i>Ophioglossum thermale</i>       | SRR6920622 | ✓       | ✓        | ✓       | ✓        |         |          |         |          | ✓           | ✓            |
| <i>Ophioglossum vulgatum</i>       | SRR2103720 | ✓       | ✓        | ✓       | ✓        |         |          |         |          | ✓           | ✓            |
| <i>Osmundastrum cinnamomeum</i>    | ERR2041191 | ✓       | ✓        | ✓       | ✓        |         |          |         |          | ✓           | ✓            |
| <i>Osmunda japonica</i>            | SRR2103721 | ✓       | ✓        | ✓       | ✓        |         |          |         |          | ✓           | ✓            |

| <i>Hymenophyllum holochilum</i>    | SRR6920702  | √               | √                | √              | √               |                |                 |                  |                   | √                | √                 |
|------------------------------------|-------------|-----------------|------------------|----------------|-----------------|----------------|-----------------|------------------|-------------------|------------------|-------------------|
| <i>Vandenboschia speciosa</i>      | ERR2020652  | √               | √                | √              | √               |                |                 |                  |                   |                  |                   |
| <i>Amborella trichopoda</i>        | SRR15206987 | √               | √                | √              | √               |                |                 |                  |                   | √                | √                 |
| Species                            | SRA number  | Family-<br>S-aa | Family-<br>S-cds | Genus-<br>O-aa | Genus-<br>O-cds | Genus-S-<br>aa | Genus-S-<br>cds | Species-<br>O-aa | Species-<br>O-cds | Species-<br>S-aa | Species-<br>S-cds |
| <i>Angiopteris caudatiformis</i> √ | This study  |                 |                  |                |                 |                |                 | √                | √                 | √                | √                 |
| <i>Angiopteris fokiensis</i>       | This study  |                 |                  | √              | √               | √              | √               | √                | √                 | √                | √                 |
| <i>Angiopteris hokouensis</i>      | This study  |                 |                  |                |                 |                |                 | √                | √                 | √                | √                 |
| <i>Angiopteris sparsisora</i>      | This study  |                 |                  | √              | √               | √              | √               | √                | √                 | √                | √                 |
| <i>Angiopteris wangii</i>          | This study  |                 |                  |                |                 |                |                 | √                | √                 | √                | √                 |
| <i>Angiopteris yunnanensis</i>     | This study  |                 |                  |                |                 |                |                 | √                | √                 | √                | √                 |
| <i>Angiopteris bipinnate</i>       | This study  |                 |                  |                |                 |                |                 | √                | √                 | √                | √                 |
| <i>Angiopteris latipinna</i>       | This study  |                 |                  |                |                 |                |                 | √                | √                 | √                | √                 |
| <i>Angiopteris chingii</i>         | This study  |                 |                  |                |                 |                |                 | √                | √                 | √                | √                 |
| <i>Angiopteris subrotundata</i>    | This study  |                 |                  | √              | √               | √              | √               | √                | √                 | √                | √                 |
| <i>Christensenia aesculifolia</i>  | This study  | √               | √                | √              | √               | √              | √               |                  |                   |                  |                   |
| <i>Christensenia aesculifolia</i>  | SRR6920618  |                 |                  | √              | √               | √              | √               |                  |                   |                  |                   |
| <i>Danaea nodosa</i>               | ERR2041196  |                 |                  | √              | √               | √              | √               |                  |                   |                  |                   |
| <i>Danaea nodosa</i>               | SRR6920621  | √               | √                | √              | √               | √              | √               |                  |                   |                  |                   |
| <i>Marattia</i> sp.                | ERR3487391  |                 |                  | √              | √               | √              | √               | √                | √                 | √                | √                 |
| <i>Ptisana pellucida</i>           | SRR6920616  |                 |                  |                |                 |                |                 |                  |                   |                  |                   |
| <i>Equisetum arvense</i>           | SRR6920624  | √               | √                |                |                 |                |                 |                  |                   |                  |                   |
| <i>Equisetum diffusum</i>          | SRR2103706  | √               | √                |                |                 |                |                 |                  |                   |                  |                   |
| <i>Psilotum nudum</i>              | SRR6920623  | √               | √                |                |                 |                |                 |                  |                   |                  |                   |
| <i>Ophioglossum thermale</i>       | SRR6920622  | √               | √                |                |                 |                |                 |                  |                   |                  |                   |
| <i>Ophioglossum vulgatum</i>       | SRR2103720  | √               | √                |                |                 |                |                 |                  |                   |                  |                   |

|                                 |             |   |   |
|---------------------------------|-------------|---|---|
| <i>Osmundastrum cinnamomeum</i> | ERR2041191  | √ | √ |
| <i>Osmunda japonica</i>         | SRR2103721  | √ | √ |
| <i>Hymenophyllum holochilum</i> | SRR6920702  | √ | √ |
| <i>Vandenboschia speciosa</i>   | ERR2020652  |   |   |
| <i>Amborella trichopoda</i>     | SRR15206987 | √ | √ |

Note. “O” and “S” means performed by Orophinder and SonicParanoid. “aa” and “cds” means amino acid sequence and nucleotide sequence.

Table S3. Information of transcriptomes included in this study

| Species                           | Raw reads  | Raw bases     | Percent GC<br>of raw data | Filtered reads | Filtered bases | Percent GC of<br>filtered data |
|-----------------------------------|------------|---------------|---------------------------|----------------|----------------|--------------------------------|
| <i>Angiopteris caudatiformis</i>  | 50,727,232 | 7,659,812,032 | 46.40%                    | 47,027,154     | 7,071,635,285  | 46.78%                         |
| <i>Angiopteris fokiensis</i>      | 49,708,970 | 7,506,054,470 | 46.85%                    | 46,061,868     | 6,916,894,226  | 47.21%                         |
| <i>Angiopteris hokouensis</i>     | 49,909,892 | 7,536,393,692 | 46.38%                    | 46,182,844     | 6,939,795,547  | 46.76%                         |
| <i>Angiopteris sparsisora</i>     | 52,742,160 | 7,964,066,160 | 46.60%                    | 48,767,488     | 7,325,393,780  | 46.96%                         |
| <i>Angiopteris wangii</i>         | 51,232,230 | 7,736,066,730 | 47.02%                    | 47,540,386     | 7,144,092,364  | 47.42%                         |
| <i>Angiopteris yunnanensis</i>    | 47,412,096 | 7,159,226,496 | 47.07%                    | 43,937,712     | 6,599,561,095  | 47.47%                         |
| * <i>Angiopteris bipinnate</i>    | 47,475,778 | 7,168,842,478 | 46.84%                    | 44,062,764     | 6,620,698,777  | 47.24%                         |
| * <i>Angiopteris latipinna</i>    | 46,204,608 | 6,976,895,808 | 46.78%                    | 42,900,906     | 6,443,400,757  | 47.17%                         |
| * <i>Angiopteris chingii</i>      | 45,021,794 | 6,798,290,894 | 46.59%                    | 41,613,264     | 6,256,095,110  | 46.92%                         |
| * <i>Angiopteris subrotundata</i> | 56,347,342 | 8,508,448,642 | 46.82%                    | 52,013,624     | 7,796,020,285  | 47.08%                         |
| <i>Christensenia aesculifolia</i> | 48,211,488 | 7,279,934,688 | 47.30%                    | 44,635,604     | 6,705,581,279  | 47.70%                         |
| <i>Christensenia aesculifolia</i> | 23,400,326 | 2,363,432,926 | 46.29%                    | 21,892,288     | 2,209,225,642  | 46.04%                         |
| <i>Danaea nodosa</i>              | 31,192,790 | 2,807,351,100 | 48.95%                    | 31,192,352     | 2,805,994,132  | 48.95%                         |
| <i>Danaea nodosa</i>              | 48,290,300 | 7,243,545,000 | 47.62%                    | 46,770,954     | 6,278,417,128  | 47.19%                         |
| <i>Marattia</i> sp.               | 22,432,808 | 2,018,952,720 | 44.87%                    | 22,432,080     | 2,017,698,528  | 44.87%                         |
| <i>Ptisana pellucida</i>          | 31,785,910 | 3,210,376,910 | 47.68%                    | 29,564,784     | 2,982,169,052  | 47.37%                         |
| <i>Equisetum arvense</i>          | 19,888,142 | 2,008,702,342 | 46.83%                    | 18,801,736     | 1,895,566,522  | 46.75%                         |
| <i>Equisetum diffusum</i>         | 37,143,940 | 4,680,136,440 | 48.28%                    | 33,109,634     | 4,078,250,170  | 48.26%                         |
| <i>Psilotum nudum</i>             | 17,437,634 | 1,761,201,034 | 45.94%                    | 16,595,954     | 1,673,419,188  | 45.88%                         |
| <i>Ophioglossum thermale</i>      | 30,567,136 | 3,087,280,736 | 45.23%                    | 28,574,566     | 2,881,902,694  | 45.17%                         |
| <i>Ophioglossum vulgatum</i>      | 36,397,236 | 4,586,051,736 | 51.29%                    | 33,873,546     | 4,200,456,856  | 51.43%                         |

|                                 |            |               |        |            |               |        |
|---------------------------------|------------|---------------|--------|------------|---------------|--------|
| <i>Osmundastrum cinnamomeum</i> | 19,656,280 | 1,769,065,200 | 48.23% | 19,656,160 | 1,767,620,120 | 48.23% |
| <i>Osmunda japonica</i>         | 34,138,716 | 4,301,478,216 | 48.68% | 31,748,310 | 3,937,276,206 | 48.71% |
| <i>Hymenophyllum holochilum</i> | 20,644,362 | 3,096,654,300 | 48.49% | 20,077,500 | 2,825,831,220 | 48.15% |
| <i>Vandenboschia speciosa</i>   | 66,346,550 | 6,701,001,550 | 47.46% | 62,756,378 | 6,319,062,682 | 47.30% |
| <i>Amborella trichopoda</i>     | 79,878,588 | 7,941,924,719 | 44.68% | 78,938,126 | 7,848,172,731 | 44.69% |

\*Show these species have been recognized as the members of *Archangiopteris* historically.
