# Supplementary figures and images for: Transcriptome-Based Study on the Phylogeny and Hybridization of Marattialean Ferns (Marattiaceae)
Source: MDPI journal article supplement (doi:10.3390/plants12122237), 2023-06-07

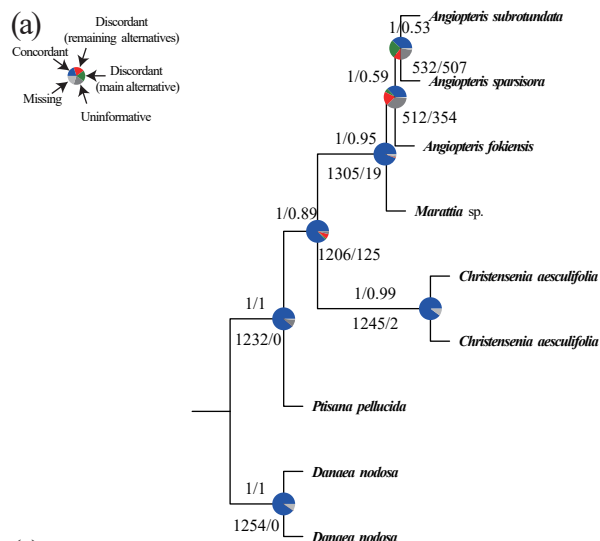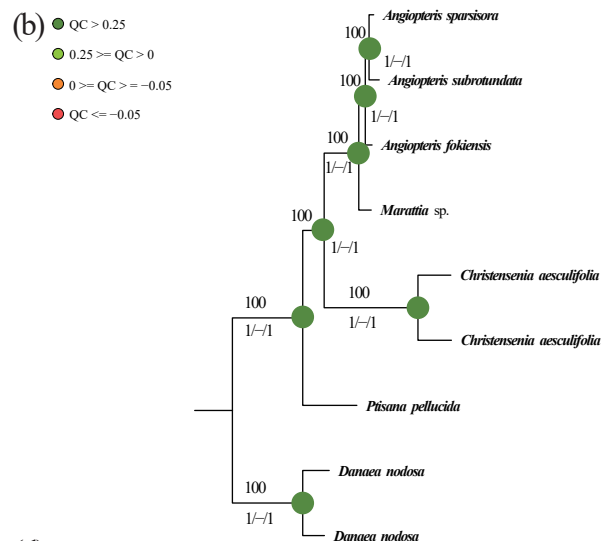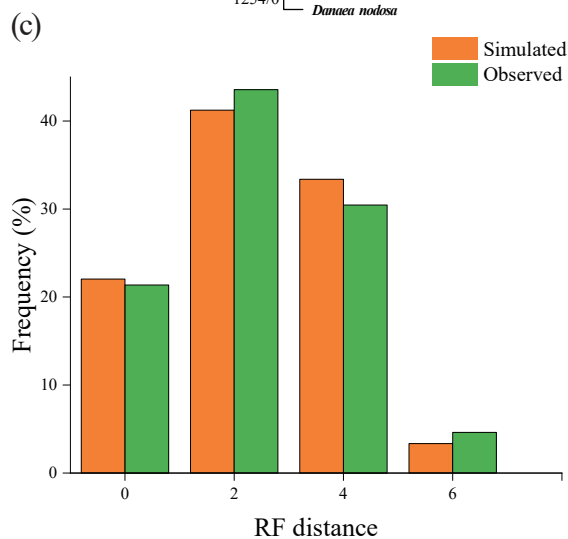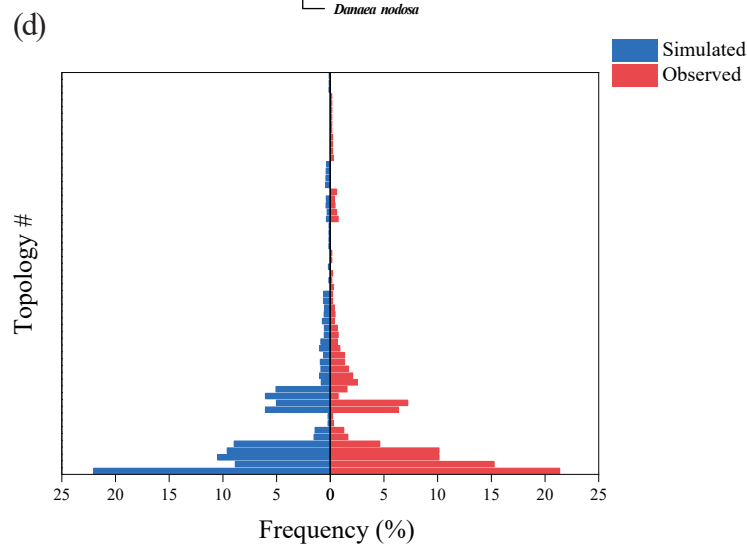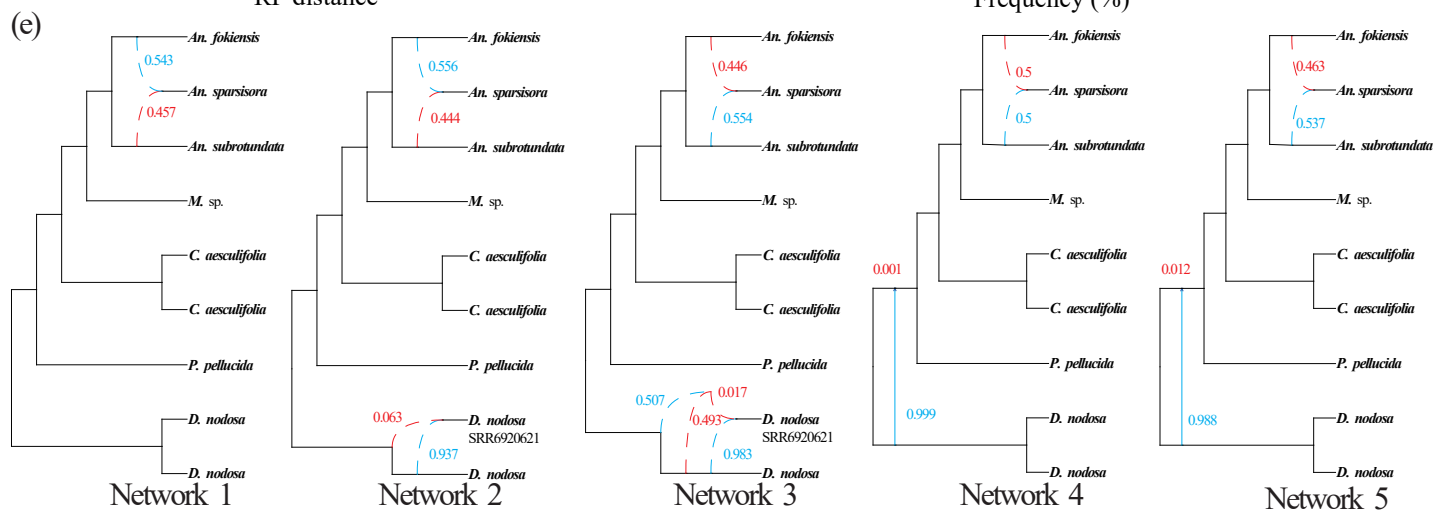

Supplement: s1 [file s1]

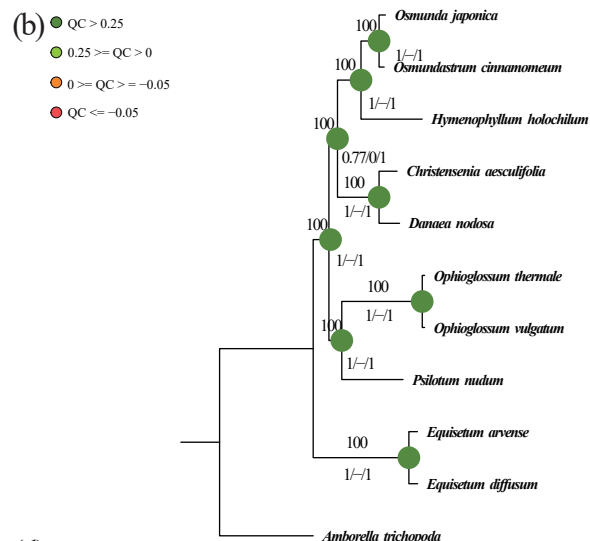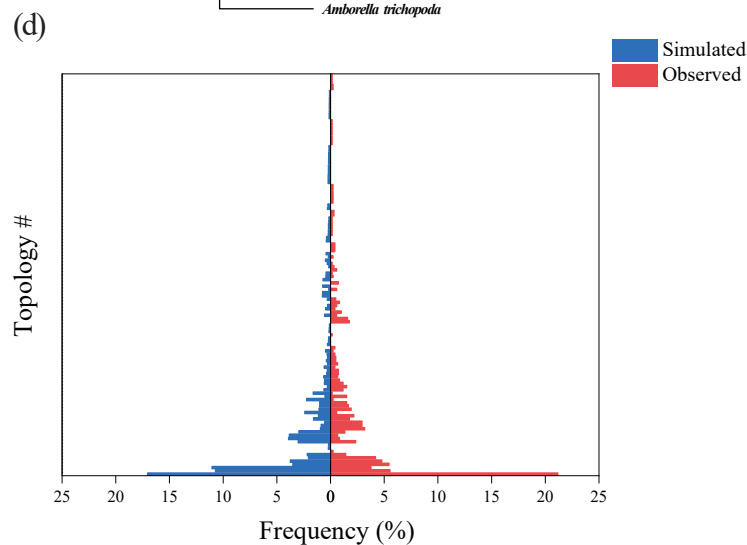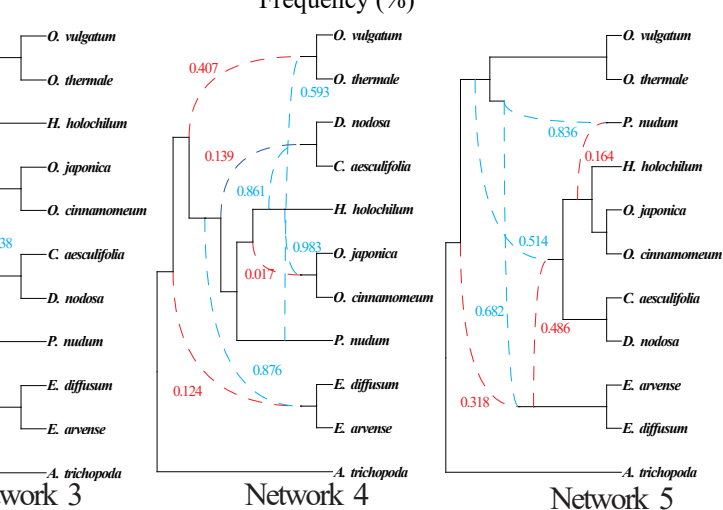

Supplement: s1 [file s1]

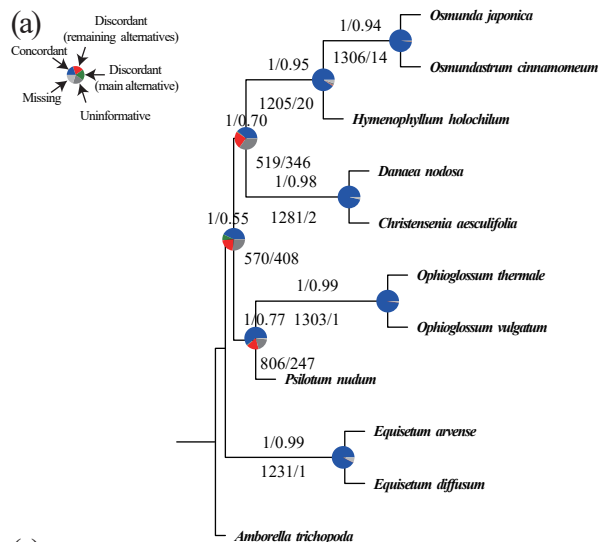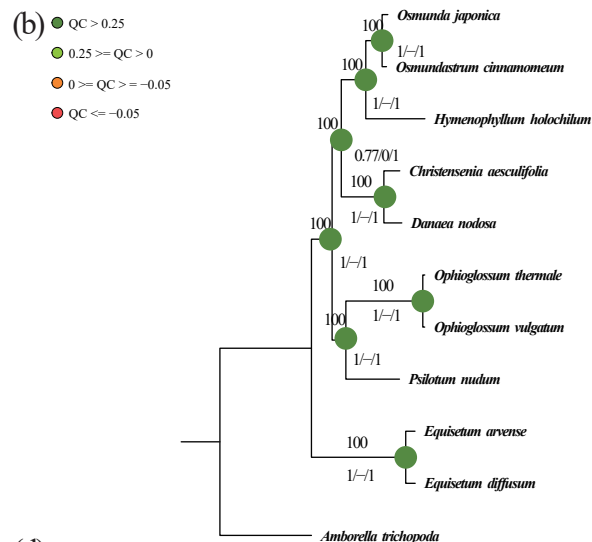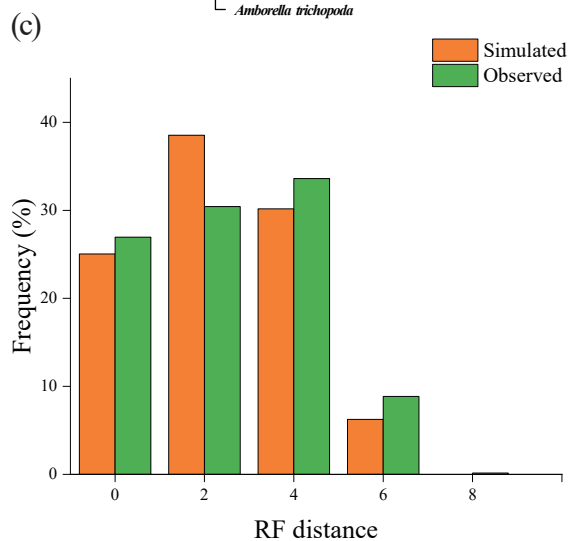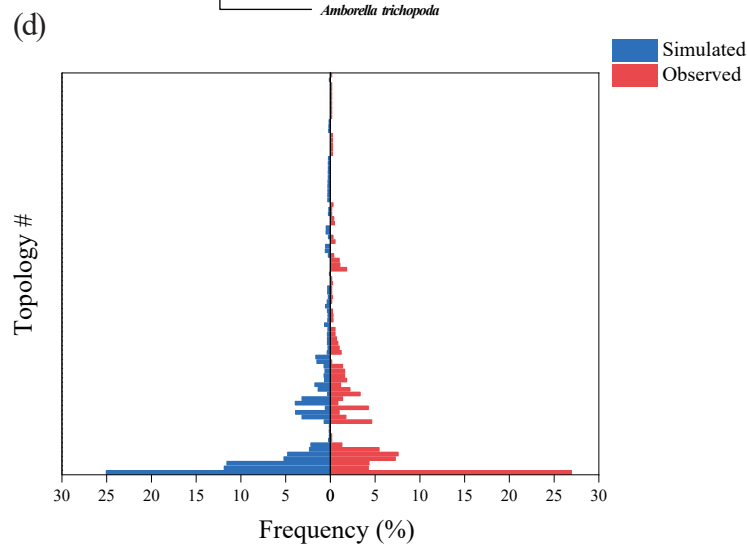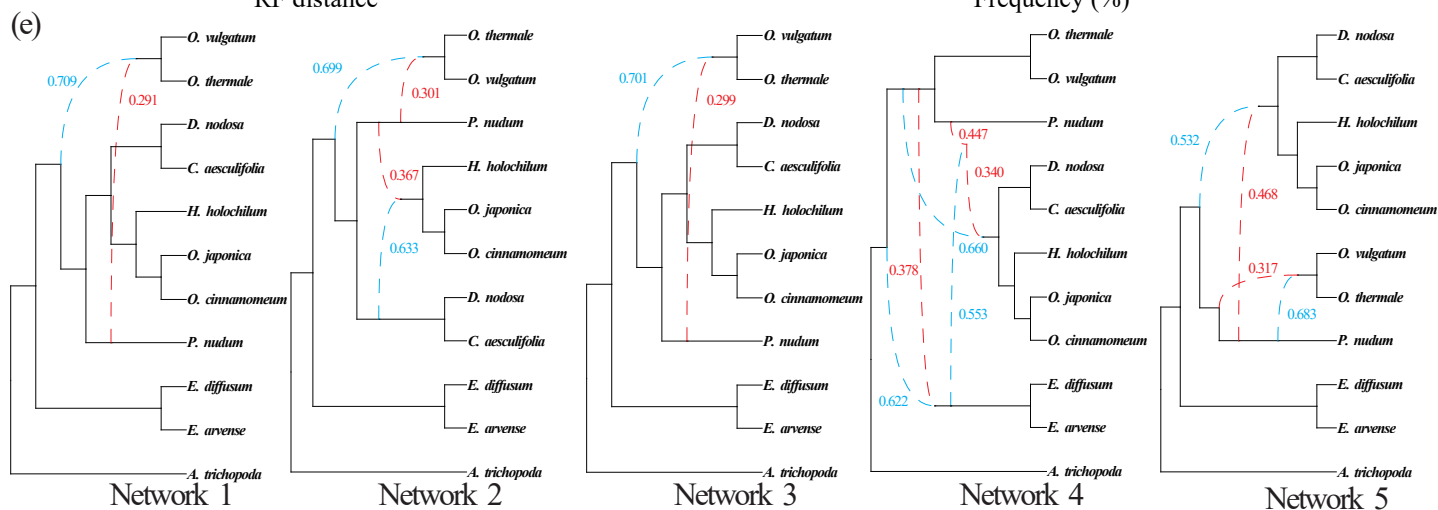

Supplement: s1 [file s1]

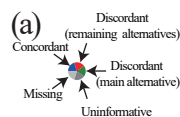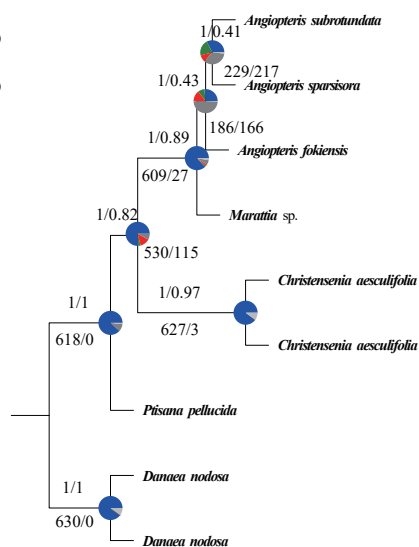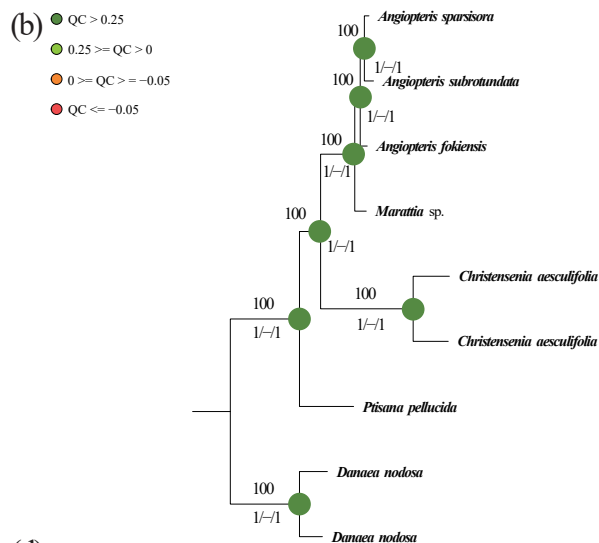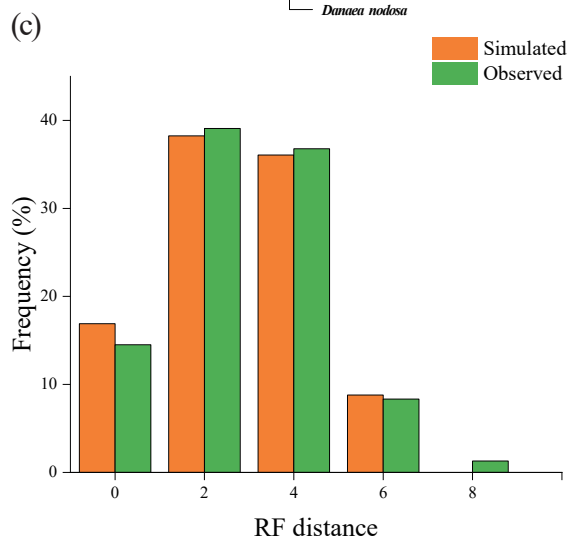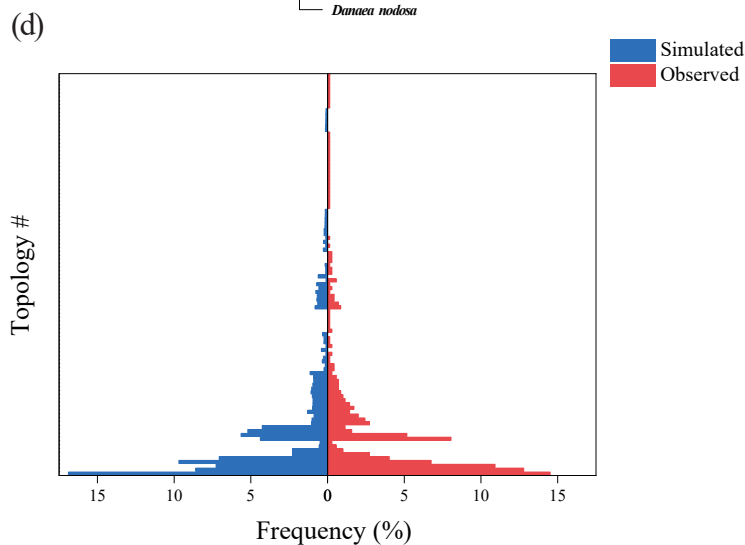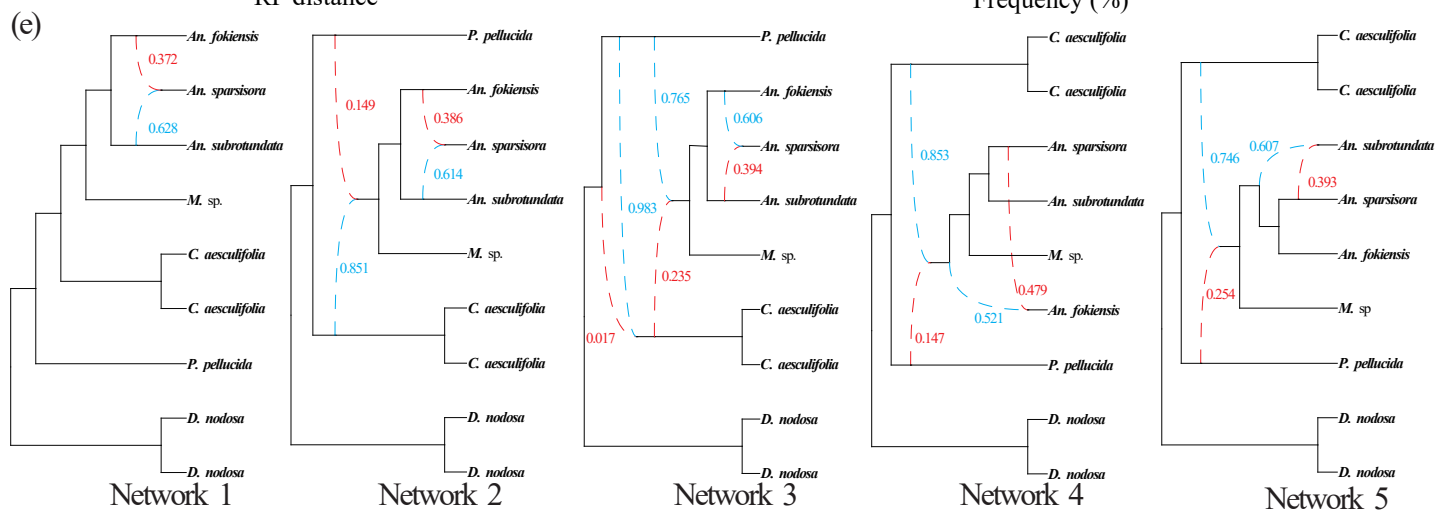

Supplement: s1 [file s1]

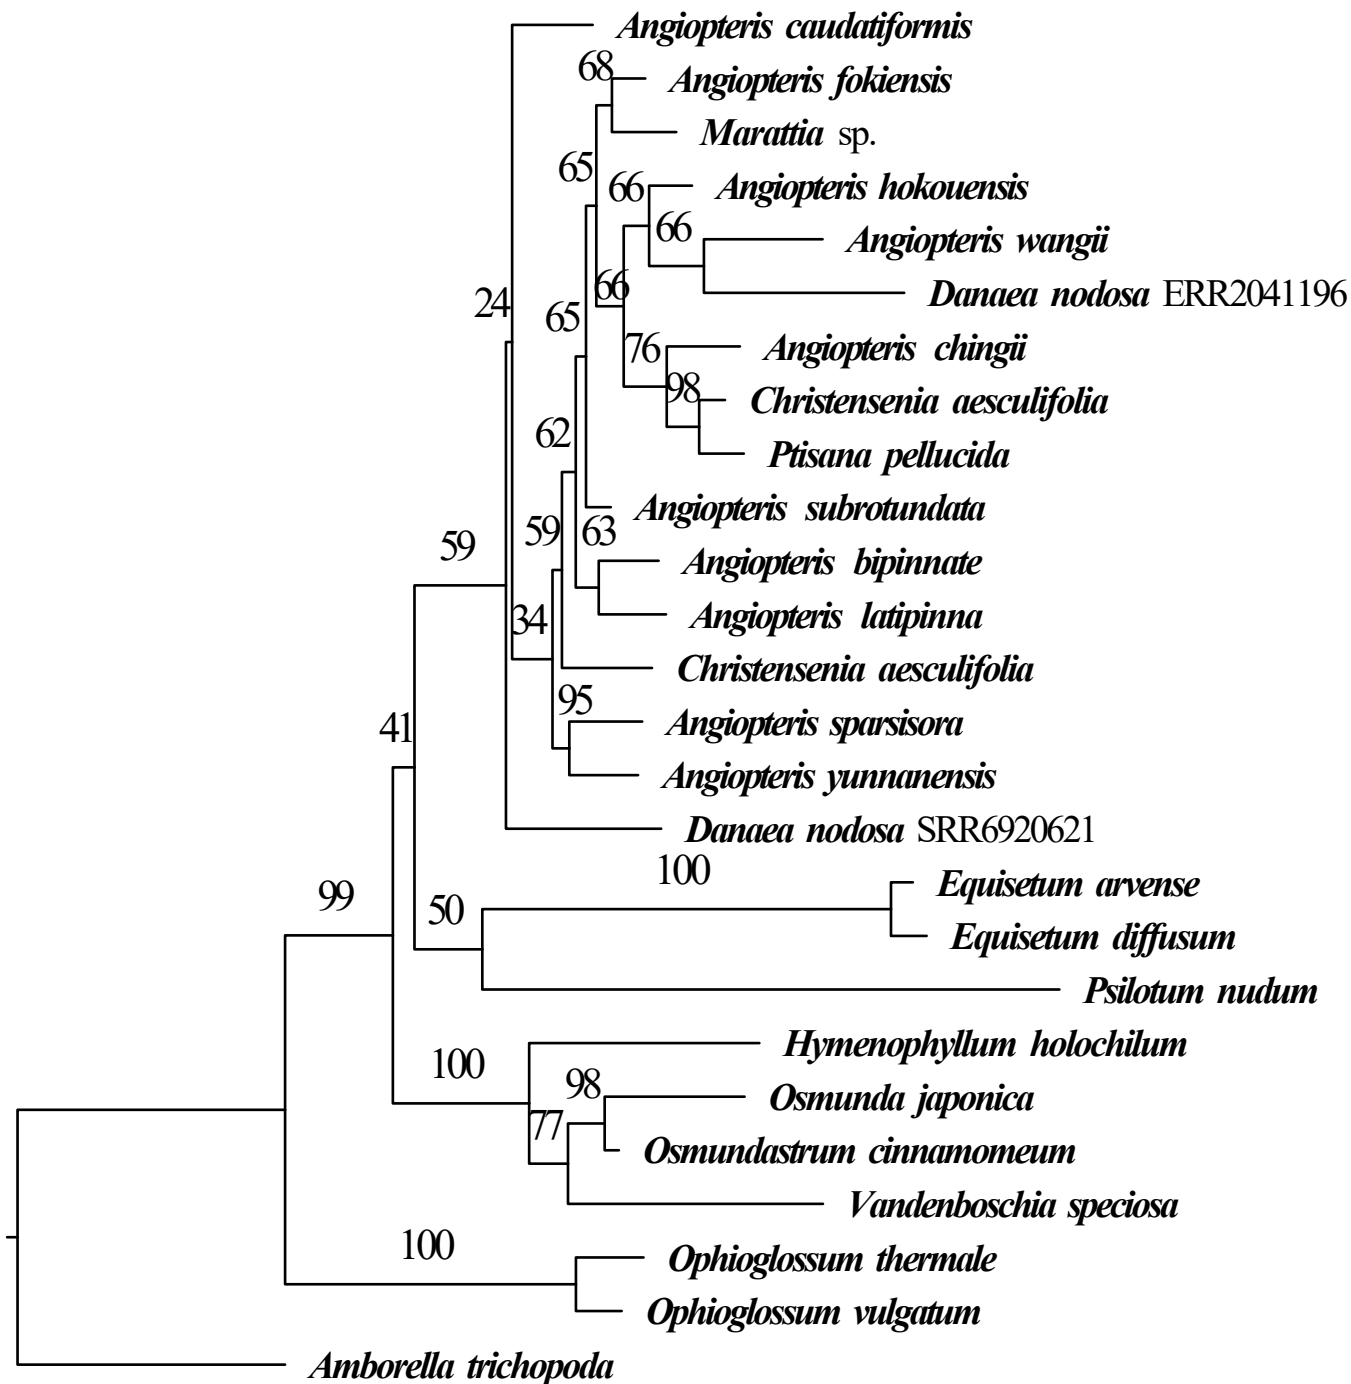

Supplement: s1 [file s1]

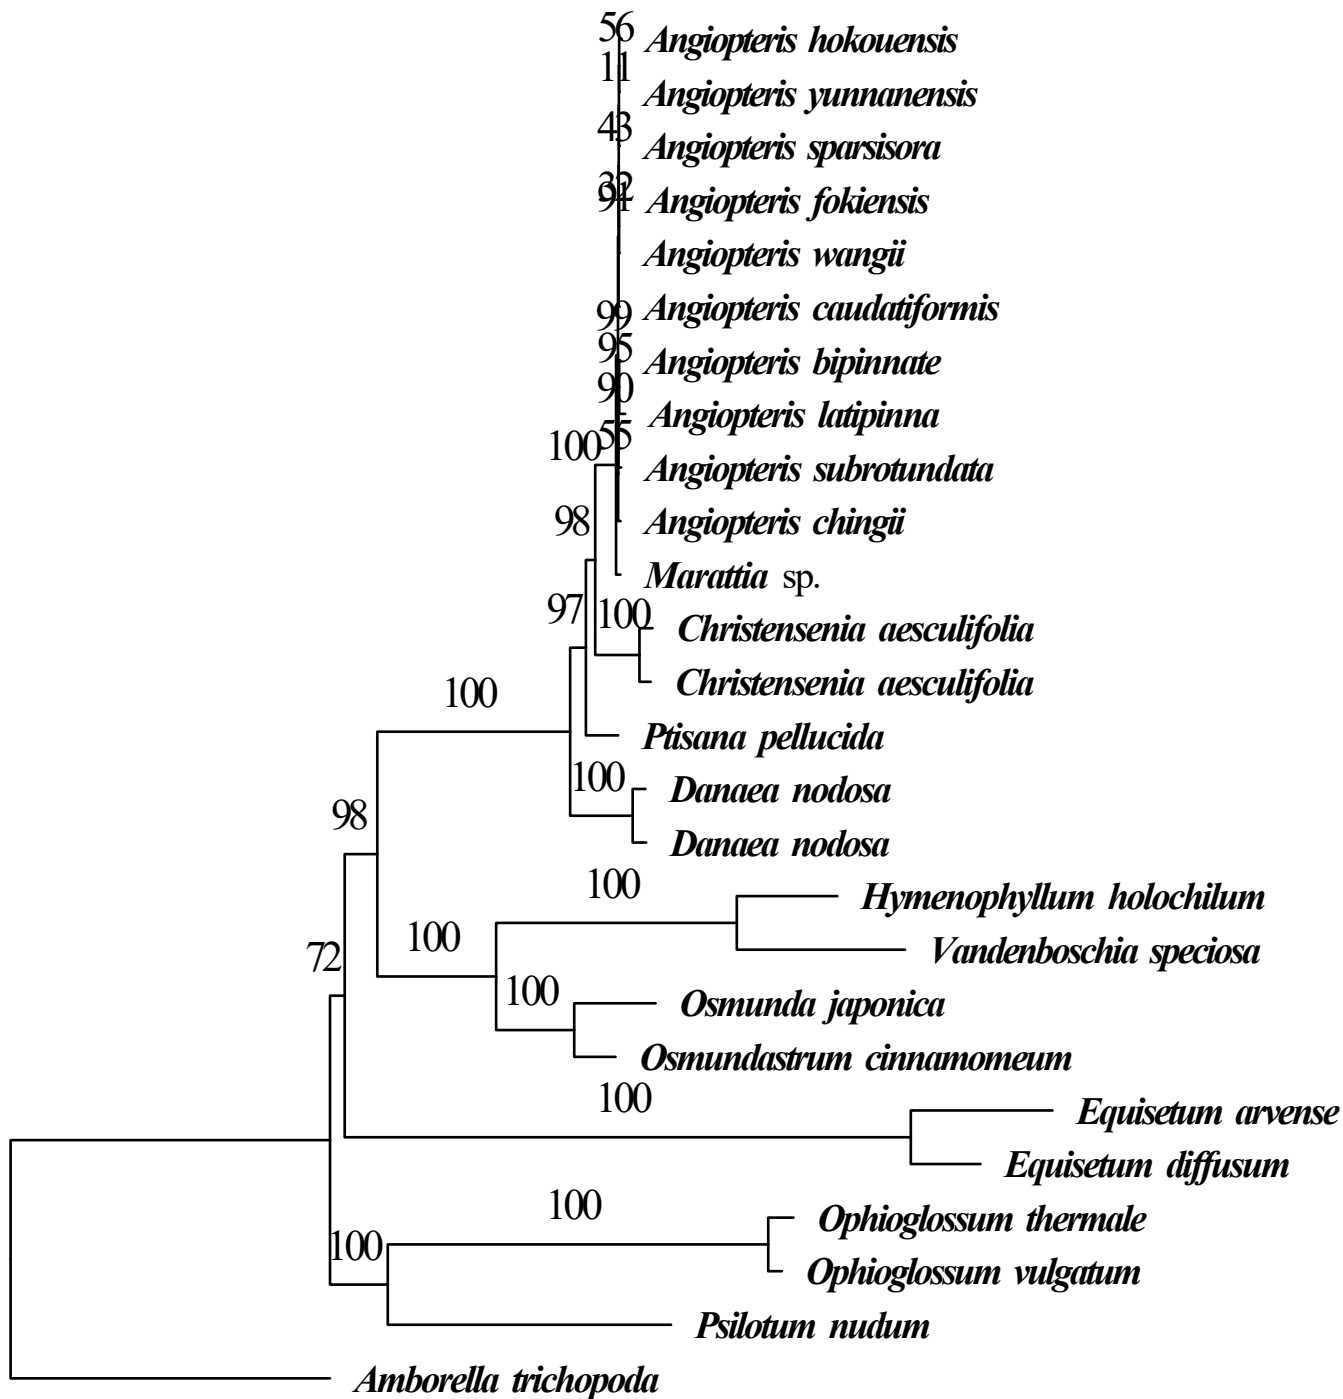

Supplement: s1 [file s1]

(a)

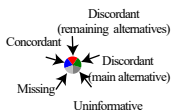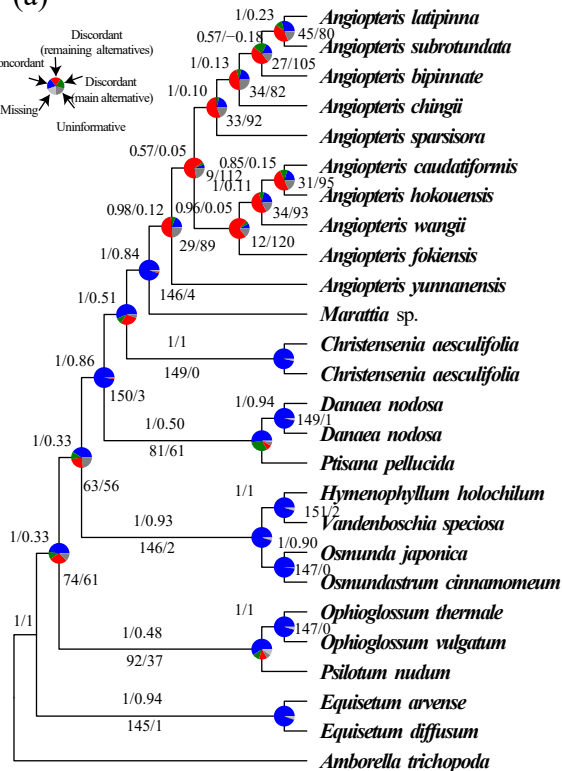

(b)

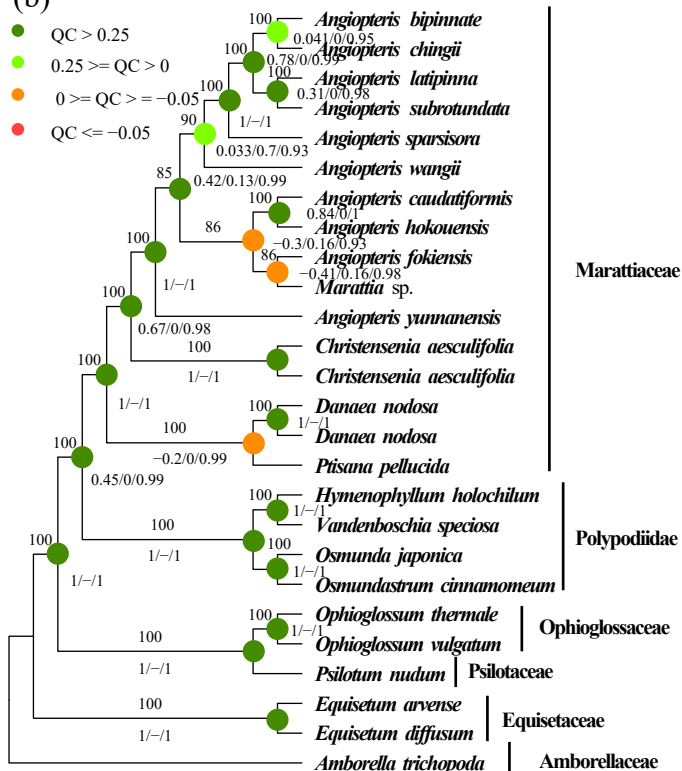

Supplement: s1 [file s1]

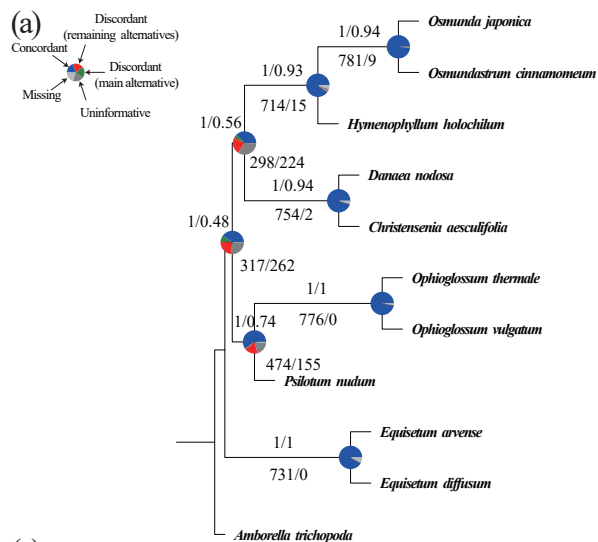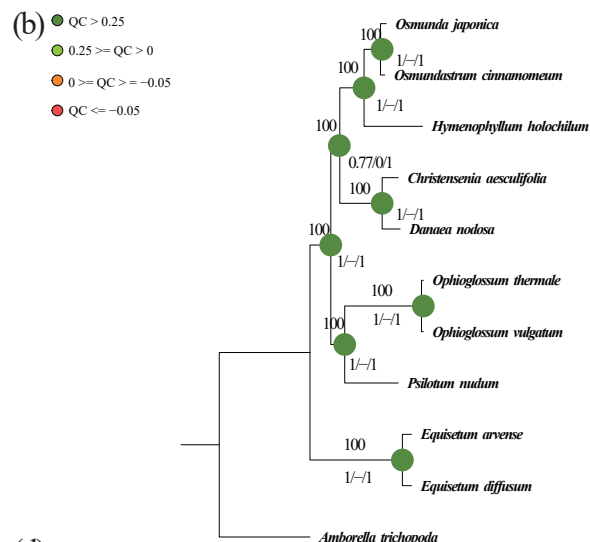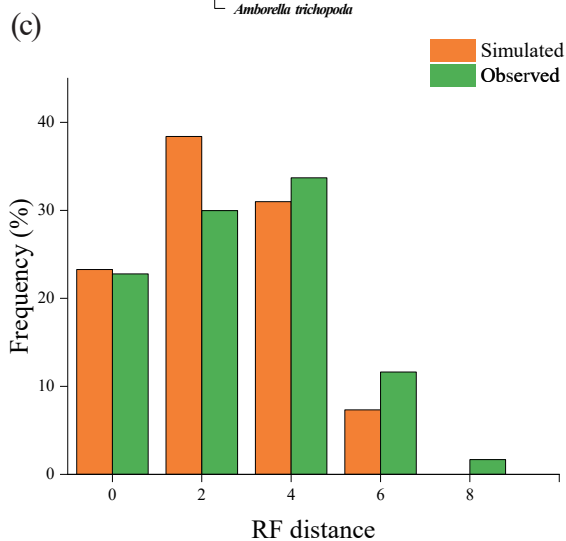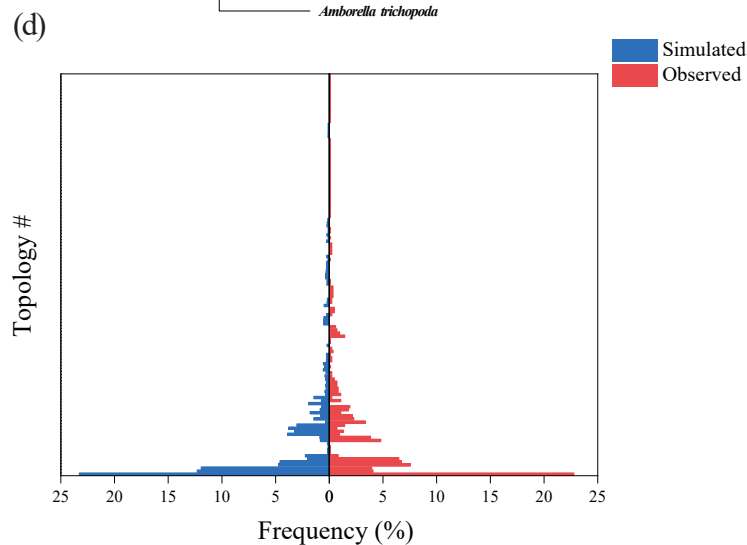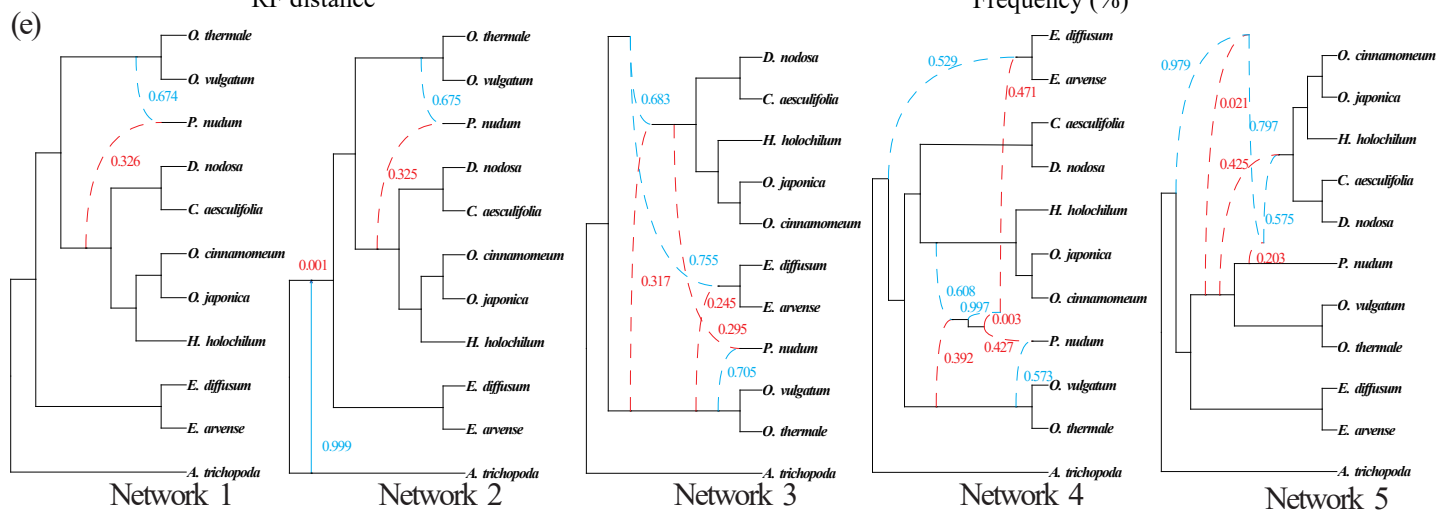

Supplement: s1 [file s1]

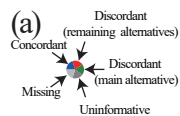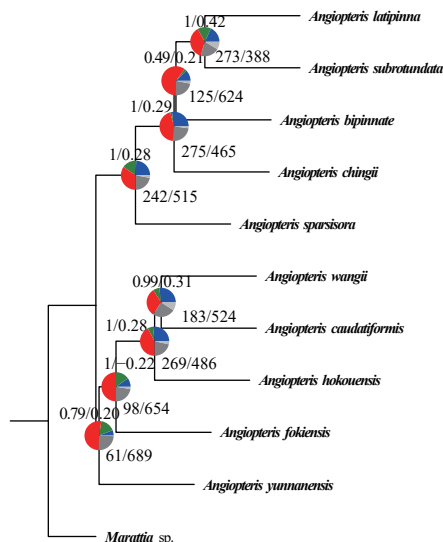

“Archangiopteris”  
“Angiopteris s.s.”

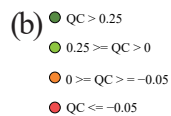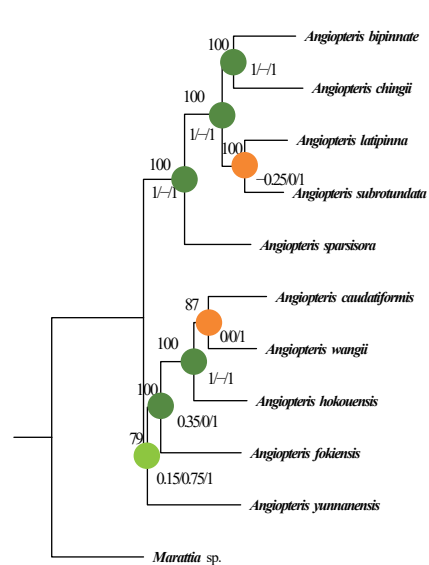

“Archangiopteris”  
“Angiopteris s.s.”

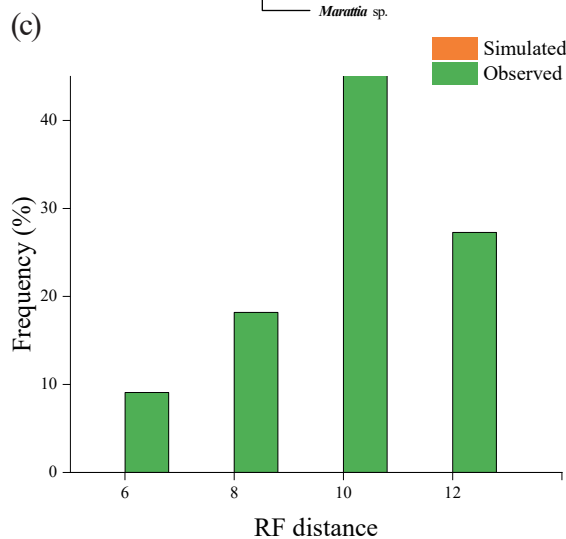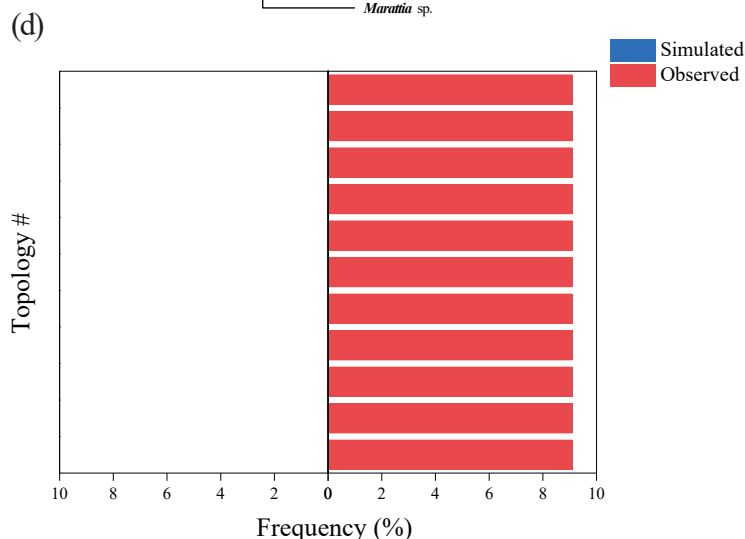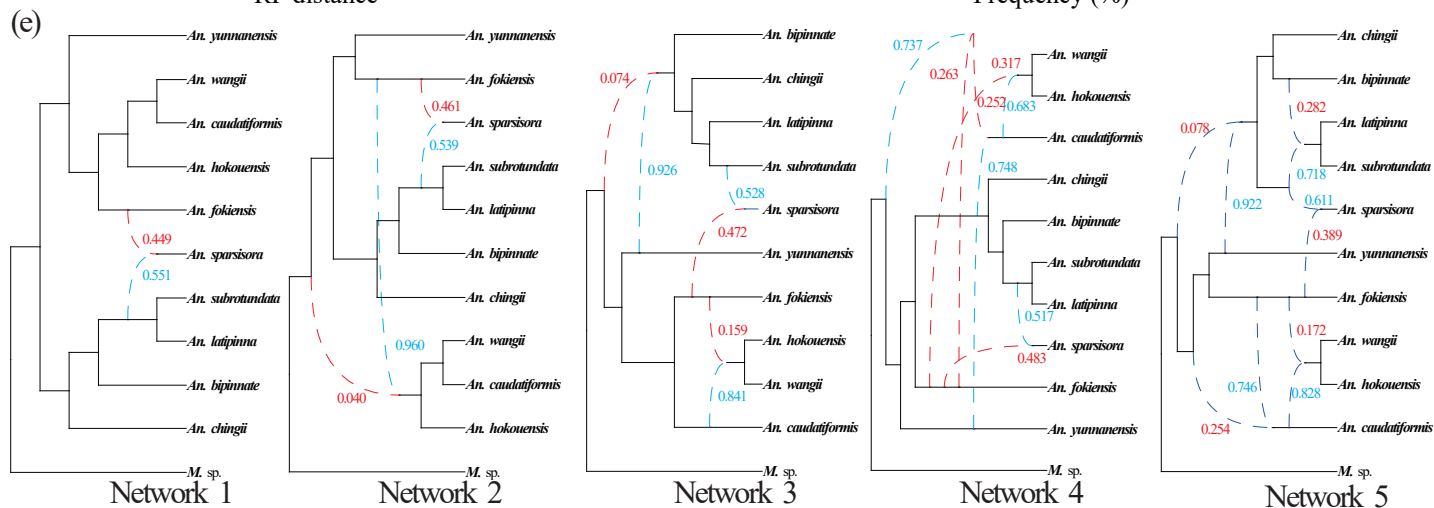

Supplement: s1 [file s1]

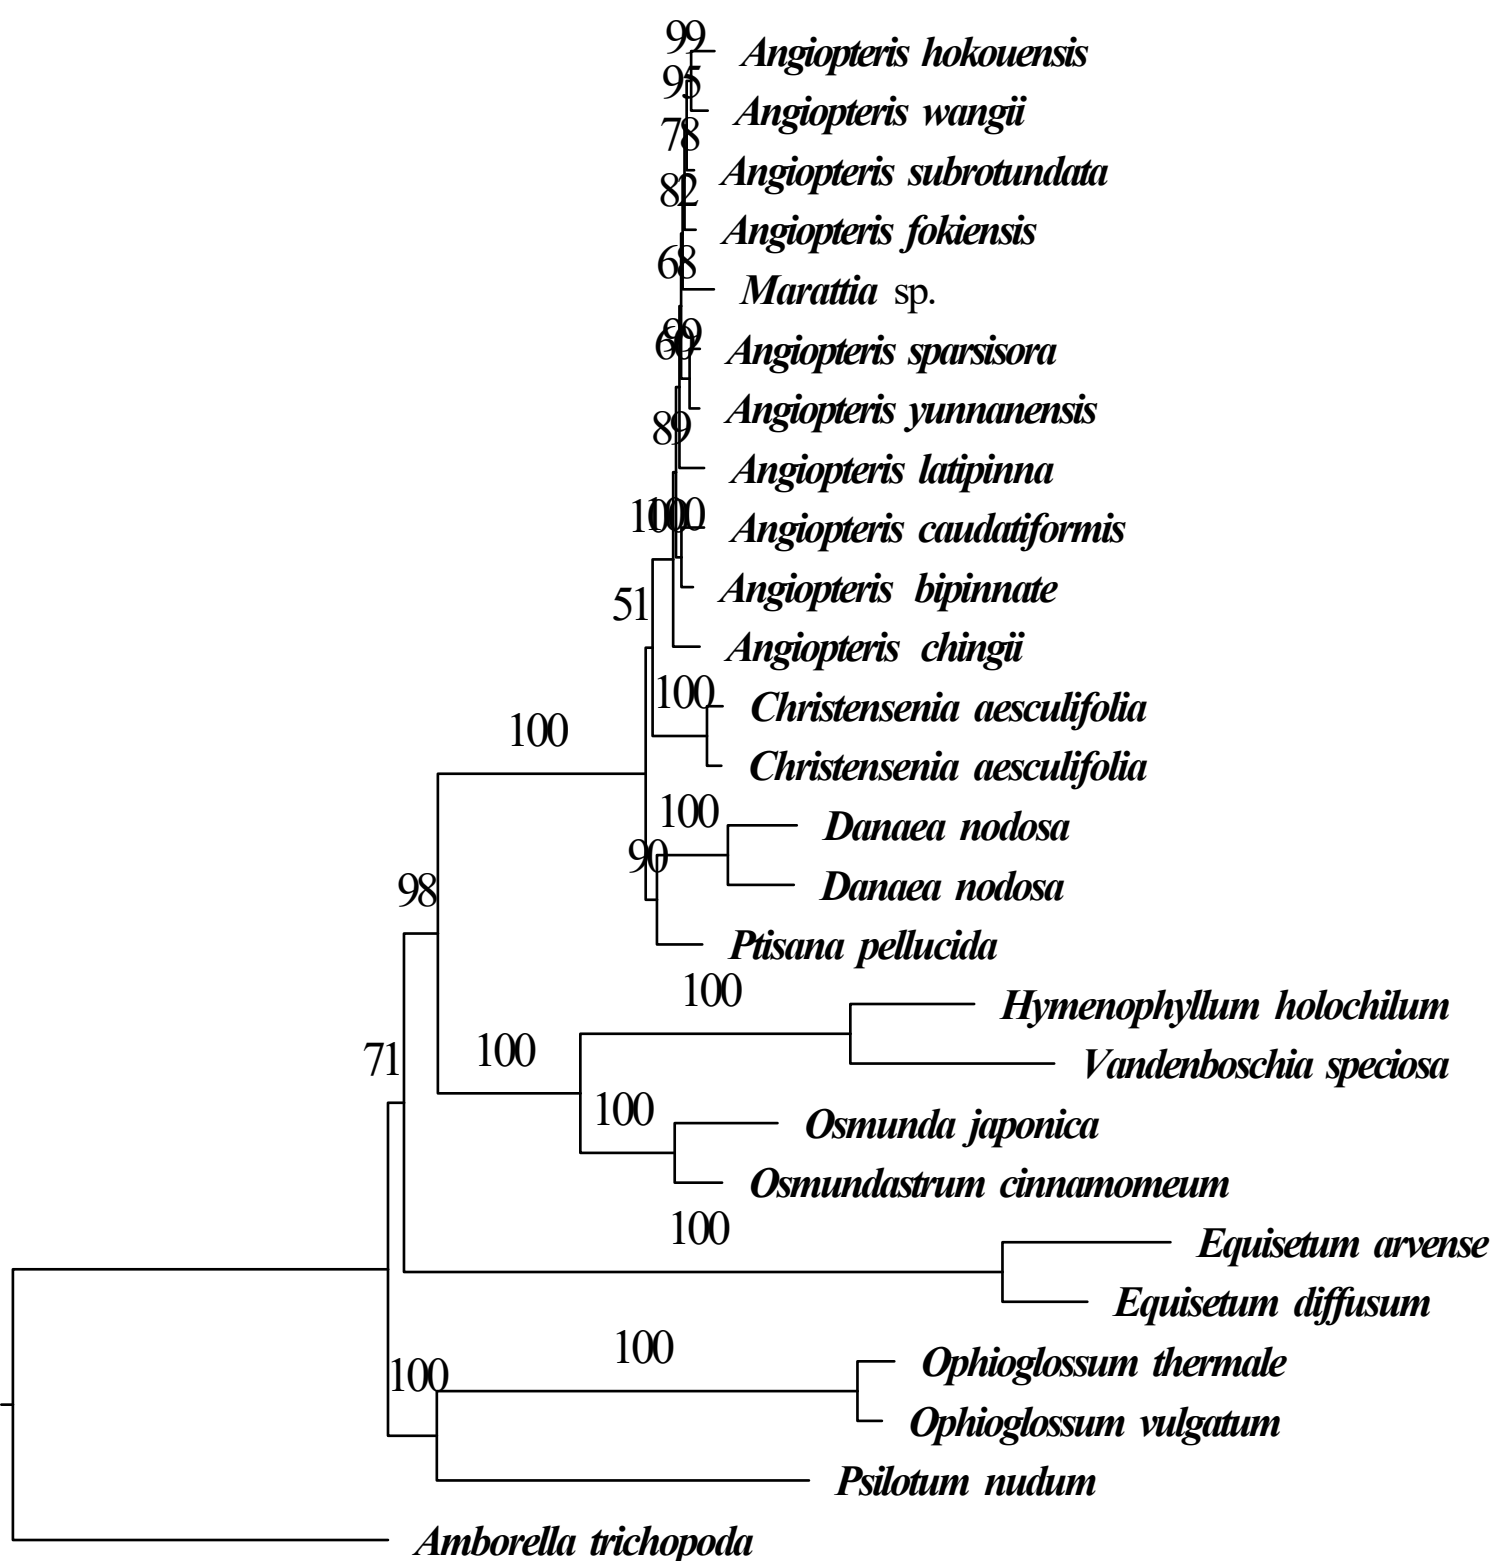

Supplement: s1 [file s1]

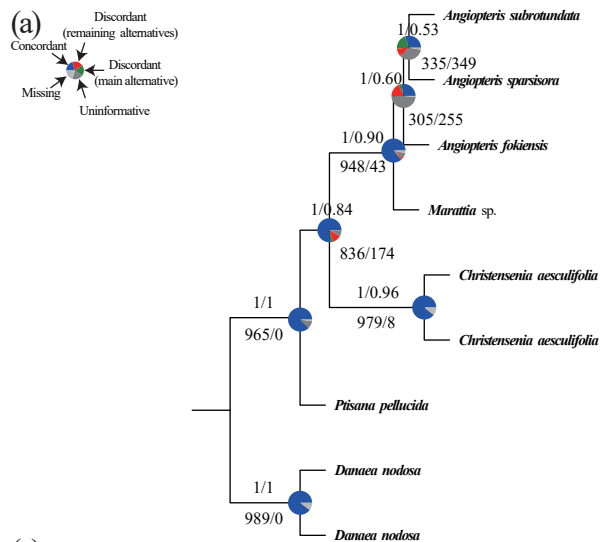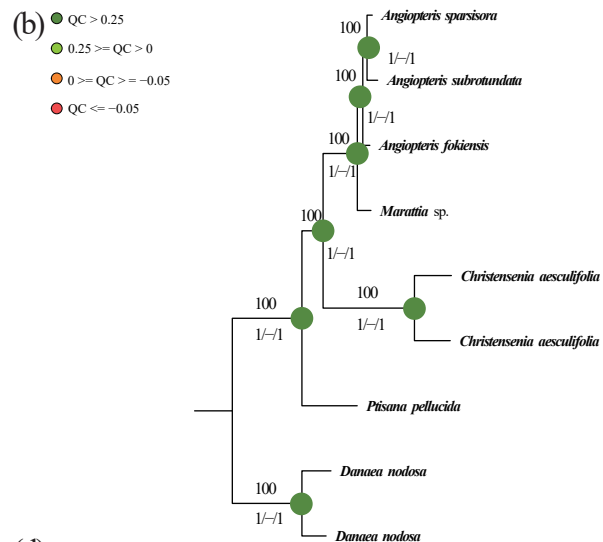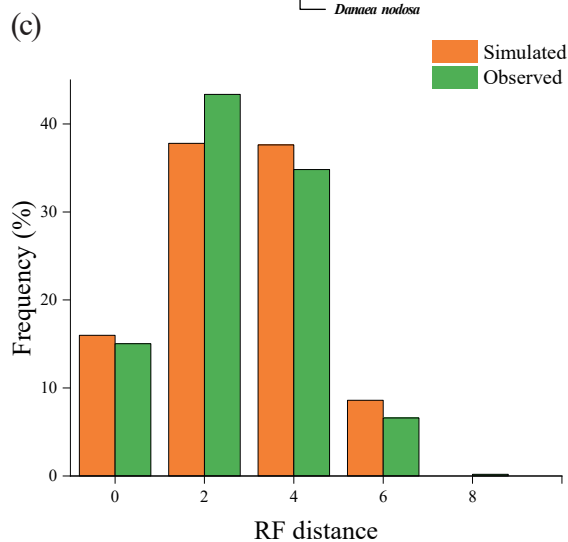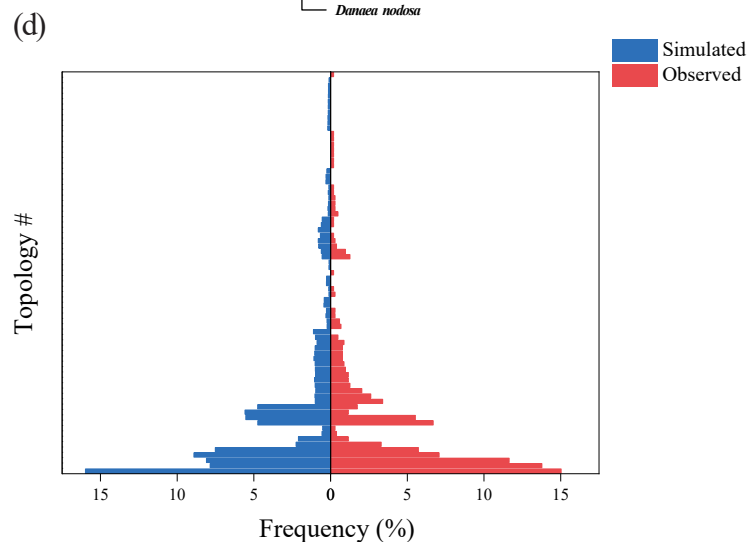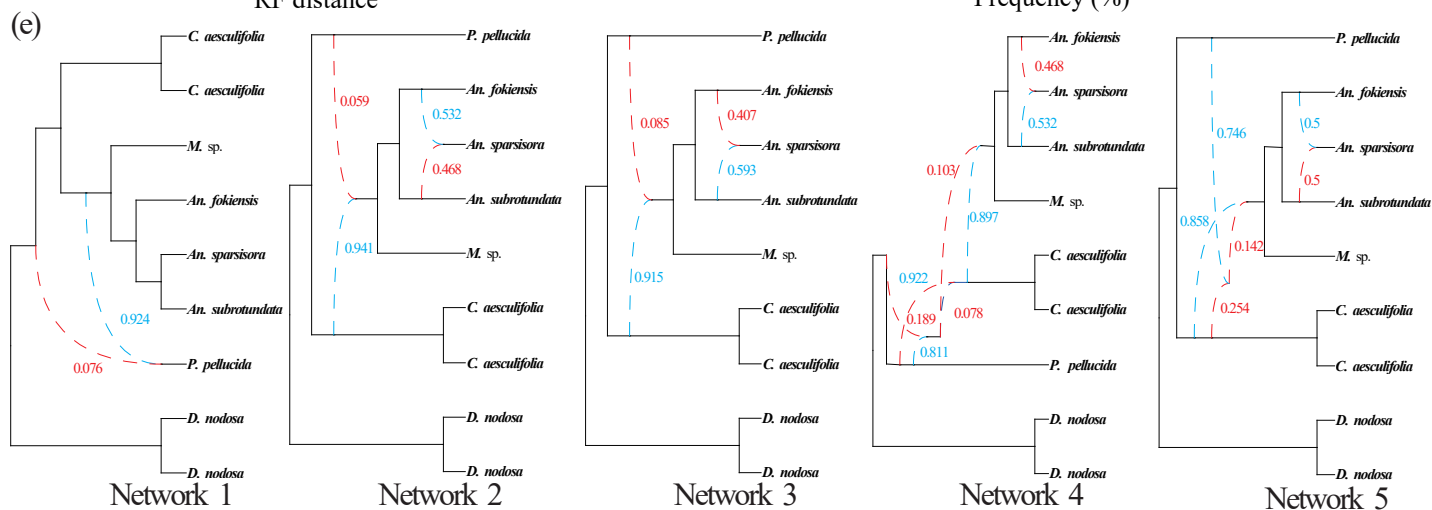

Supplement: s1 [file s1]

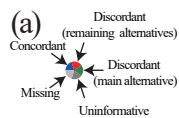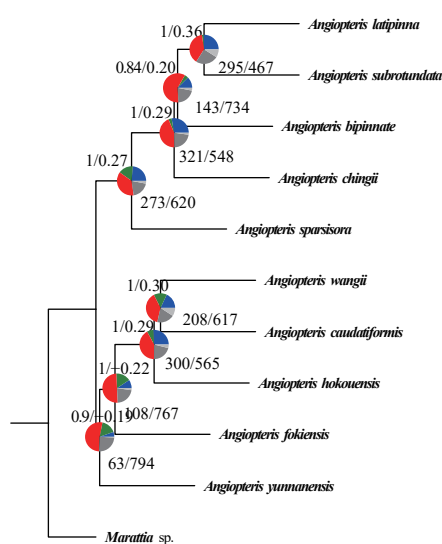

“*Archangiopteris*”

“*Angiopteris* s.s.”

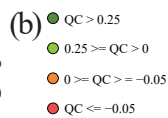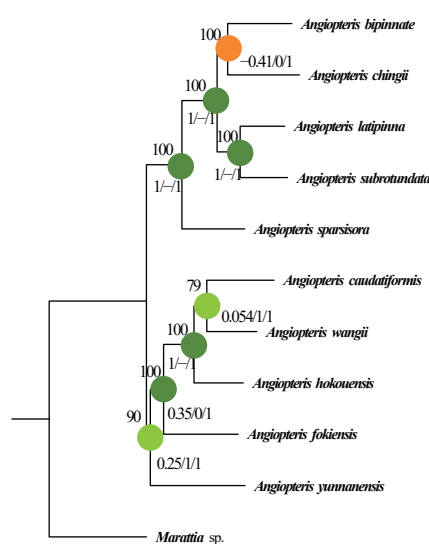

“*Archangiopteris*”

“*Angiopteris* s.s.”

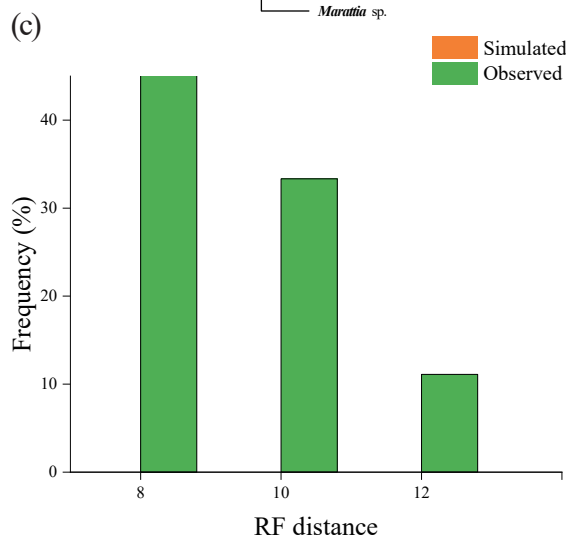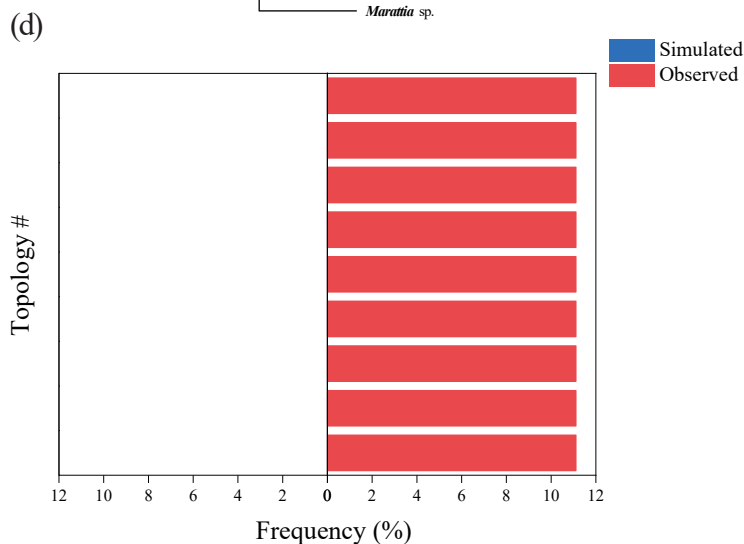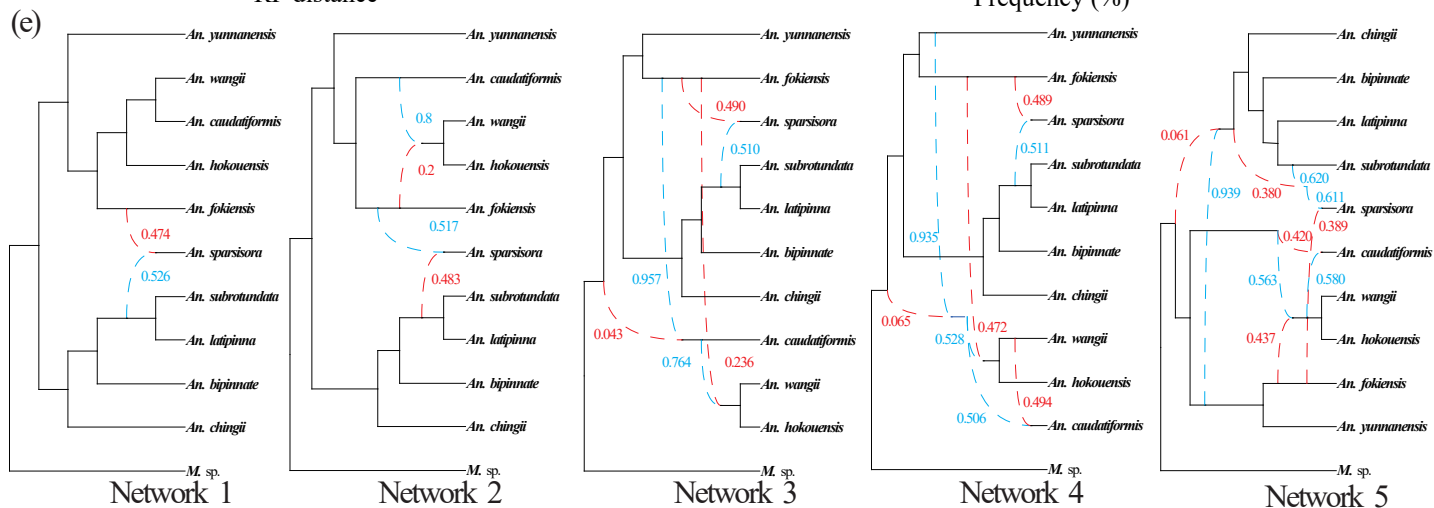

Supplement: s1 [file s1]

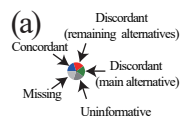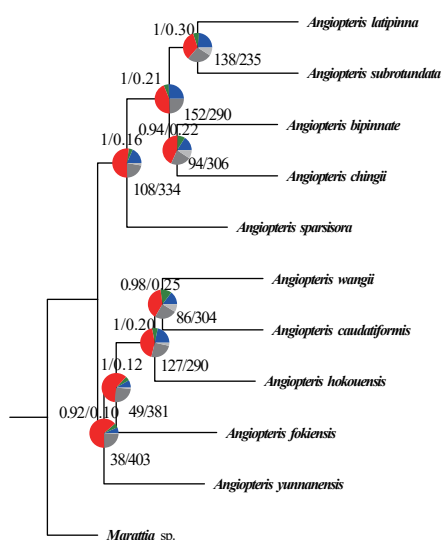

“*Archangiopteris*”

“*Angiopteris* s.s.”

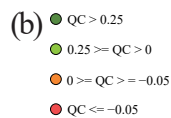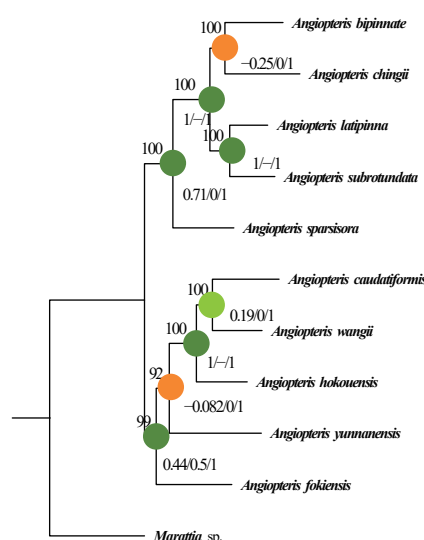

“*Archangiopteris*”

“*Angiopteris* s.s.”

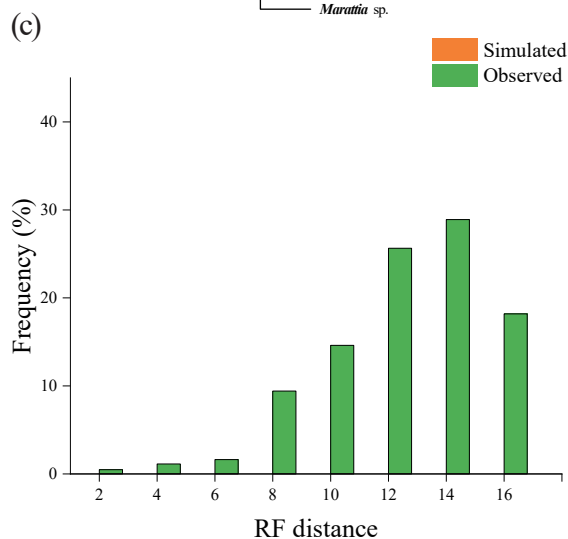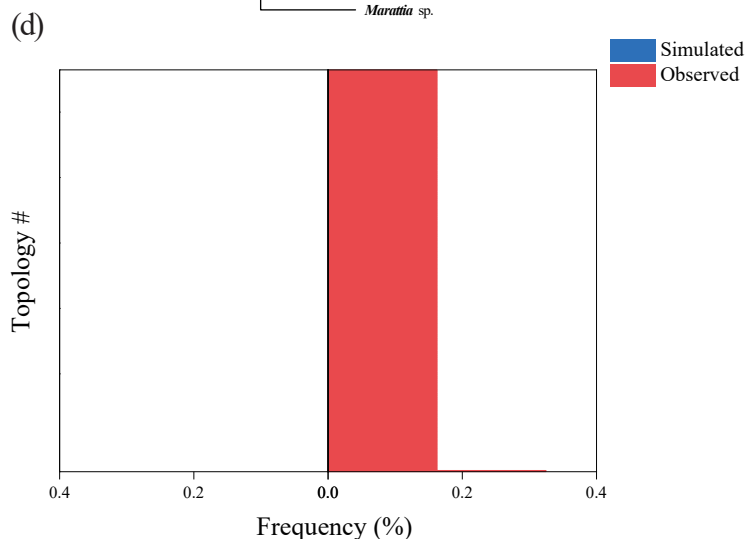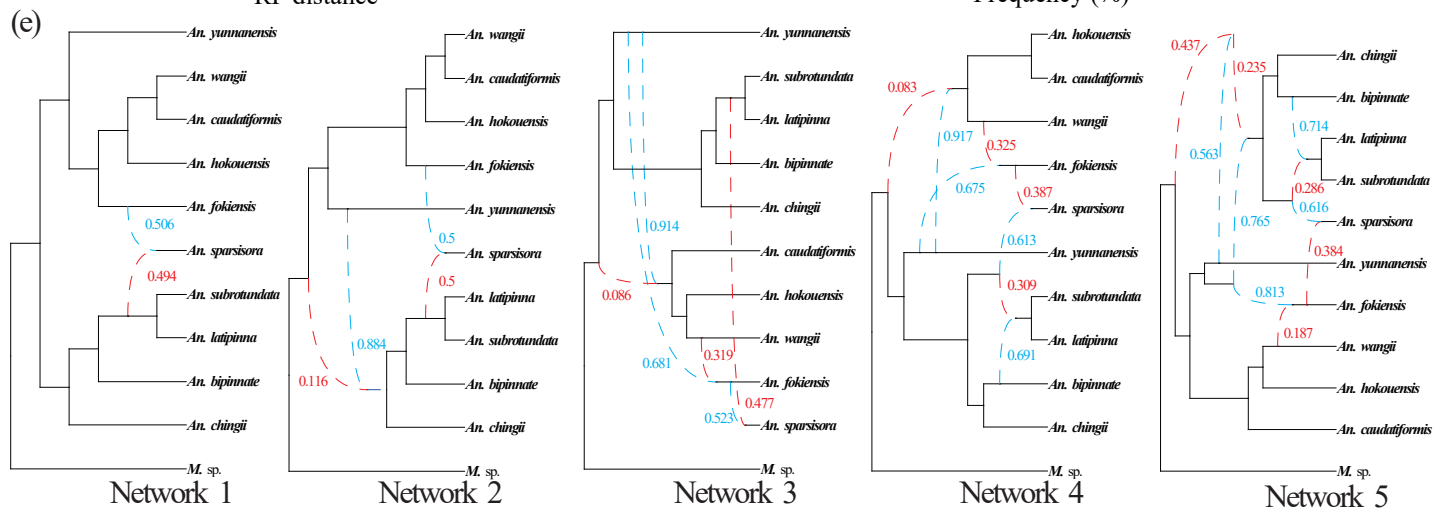

Supplement: s1 [file s1]

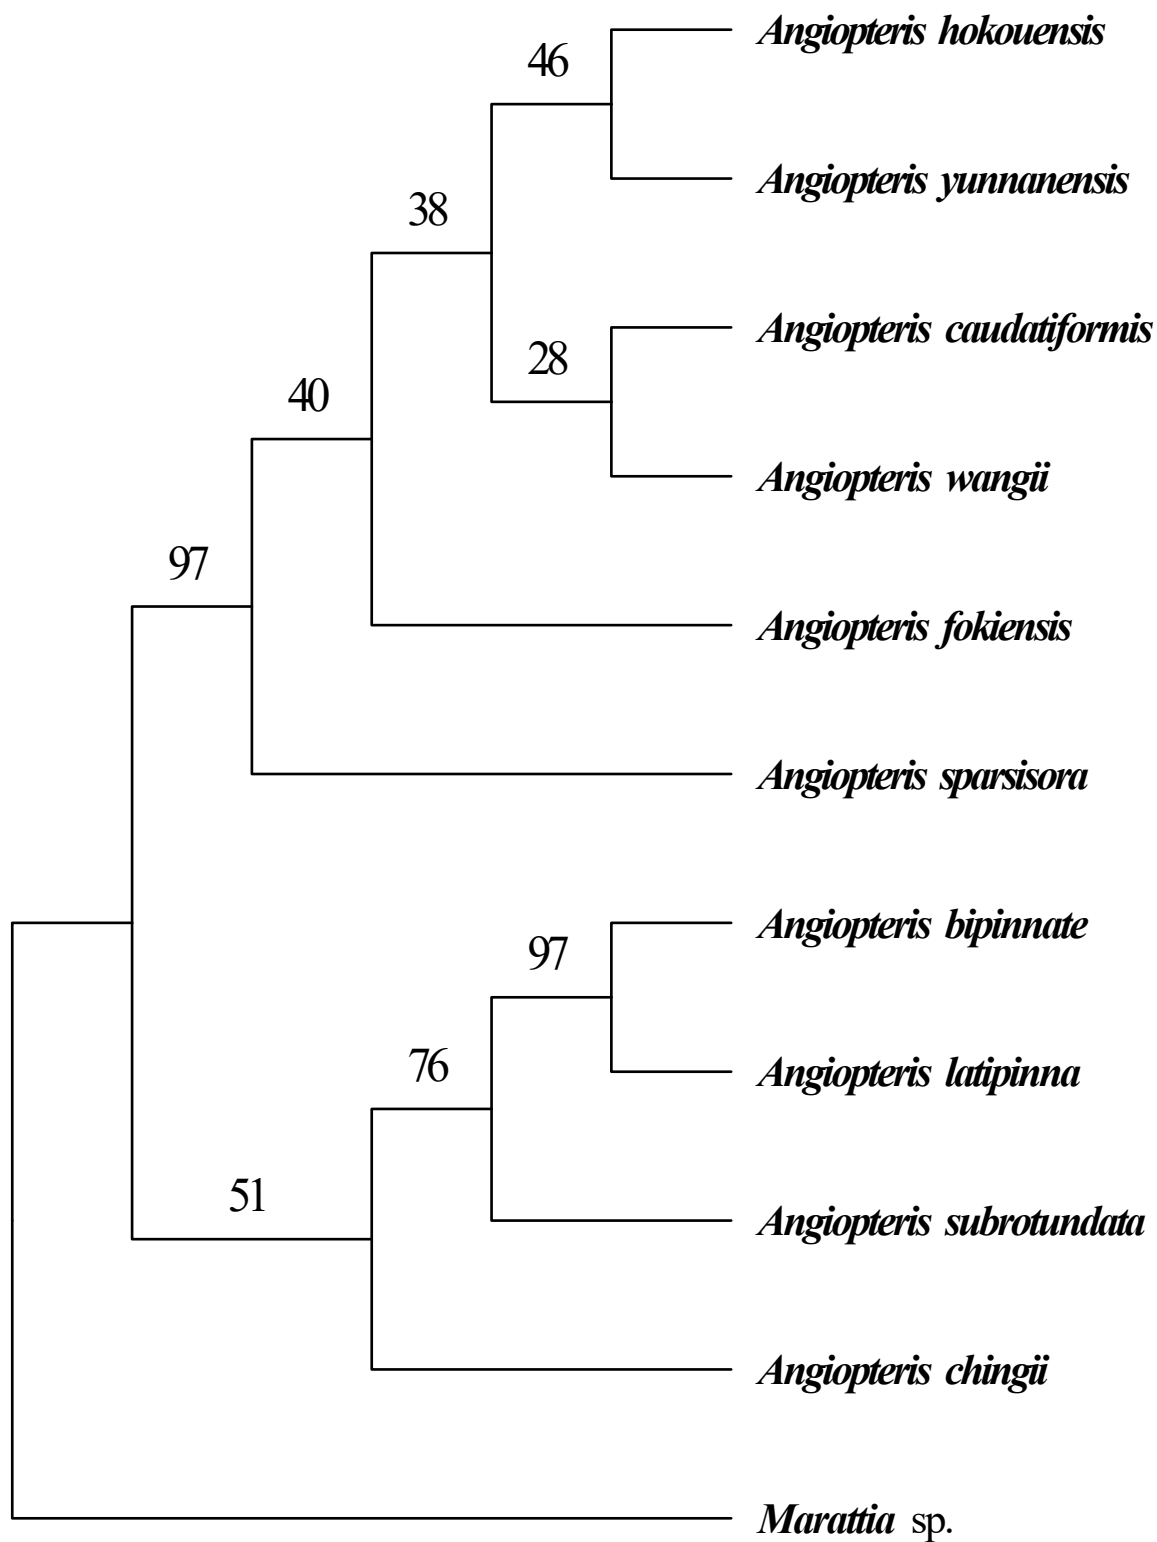

“*Angiopteris* s.s.”

“*Archangiopteris*”

Supplement: s1 [file s1]

(a)

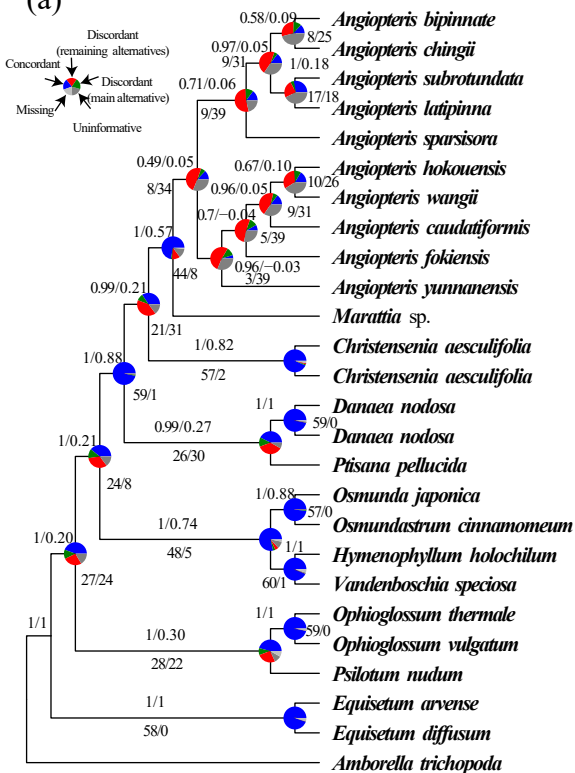

(b)

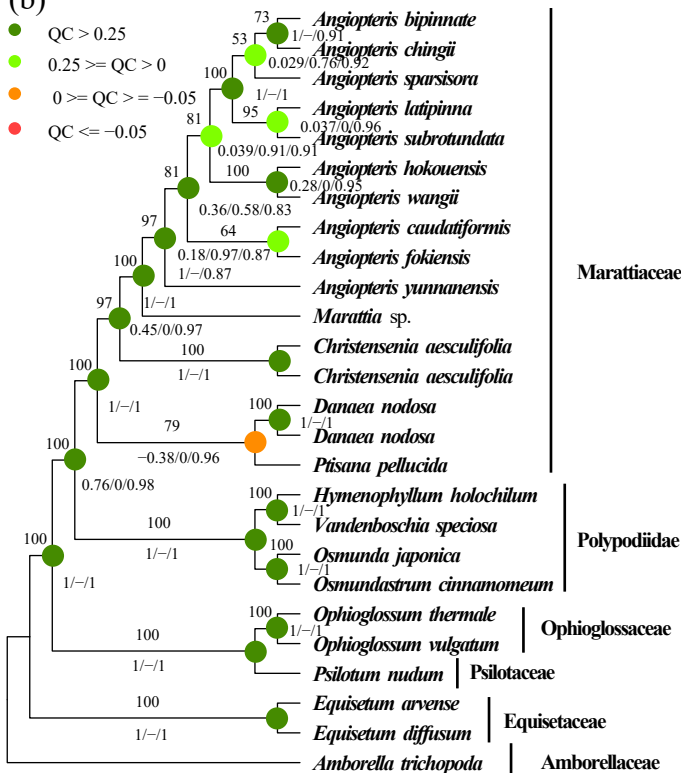

(c)

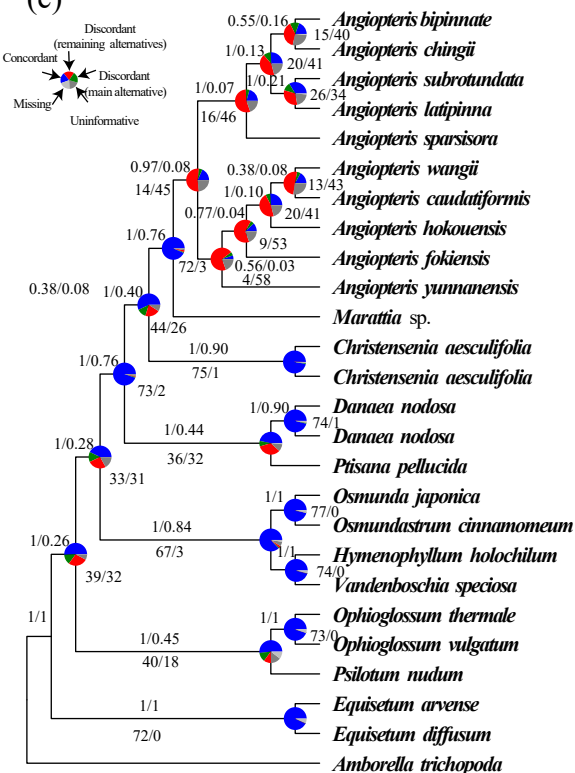

(c)

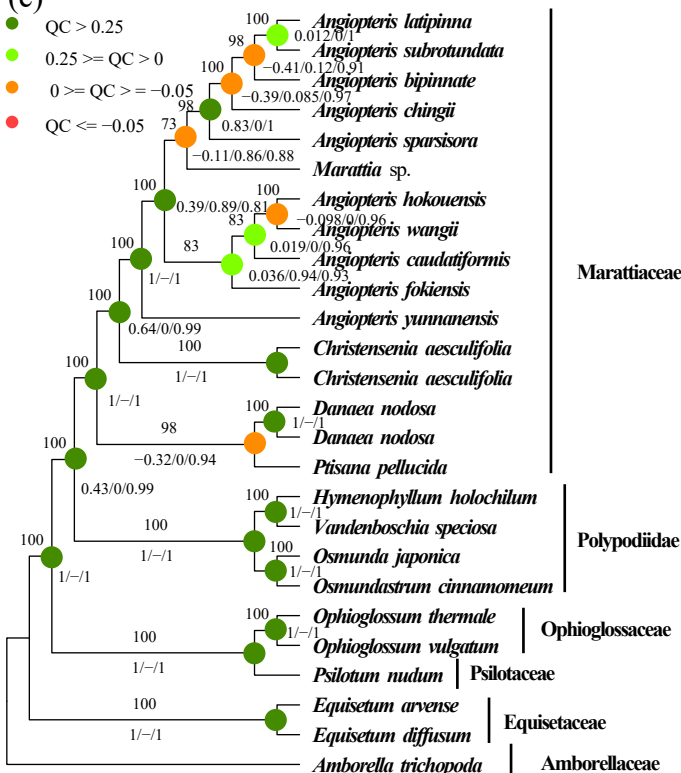

Supplement: s1 [file s1]
